# Supplementary material for: New Eudesmane-Type Sesquiterpenoids from the Mangrove-Derived Endophytic Fungus Penicillium sp. J-54
Source: MDPI journal article supplement (doi:10.3390/md16040108), 2018-03-28

## Supplementary Information

### Table of Contents

The 18S rRNA gene sequences data of *Penicillium* sp. J-54

**Figure S1.** The  $^1\text{H}$  NMR (500 MHz,  $\text{DMSO-}d_6$ ) spectrum of compound **1**

**Figure S2.** The  $^{13}\text{C}$  NMR and DEPT135 (125 MHz,  $\text{DMSO-}d_6$ ) spectrum of compound **1**

**Figure S3.** The  $^1\text{H}$ - $^1\text{H}$  COSY (500 MHz,  $\text{DMSO-}d_6$ ) spectrum of compound **1**

**Figure S4.** The HSQC (500 MHz,  $\text{DMSO-}d_6$ ) spectrum of compound **1**

**Figure S5.** The HMBC (500 MHz,  $\text{DMSO-}d_6$ ) spectrum of compound **1**

**Figure S6.** The ROESY (500 MHz,  $\text{DMSO-}d_6$ ) spectrum of compound **1**

**Figure S7.** The HRESIMS spectrum of compound **1**

**Figure S8.** The  $^1\text{H}$  NMR (500 MHz,  $\text{DMSO-}d_6$ ) spectrum of compound **2**

**Figure S9.** The  $^{13}\text{C}$  NMR and DEPT135 (125 MHz,  $\text{DMSO-}d_6$ ) spectrum of compound **2**

**Figure S10.** The  $^1\text{H}$ - $^1\text{H}$  COSY (600 MHz,  $\text{DMSO-}d_6$ ) spectrum of compound **2**

**Figure S11.** The HSQC (500 MHz,  $\text{DMSO-}d_6$ ) spectrum of compound **2**

**Figure S12.** The HMBC (500 MHz,  $\text{DMSO-}d_6$ ) spectrum of compound **2**

**Figure S13.** The ROESY (500 MHz,  $\text{DMSO-}d_6$ ) spectrum of compound **2**

**Figure S14.** The HRESIMS spectrum of compound **2**

**Figure S15.** The  $^1\text{H}$  NMR (500 MHz,  $\text{DMSO-}d_6$ ) spectrum of compound **3**

**Figure S16.** The  $^{13}\text{C}$  NMR and DEPT135 (125 MHz,  $\text{DMSO-}d_6$ ) spectrum of compound **3**

**Figure S17.** The  $^1\text{H}$ - $^1\text{H}$  COSY (500 MHz,  $\text{DMSO-}d_6$ ) spectrum of compound **3**

**Figure S18.** The HSQC (500 MHz,  $\text{DMSO-}d_6$ ) spectrum of compound **3**

**Figure S19.** The HMBC (500 MHz,  $\text{DMSO-}d_6$ ) spectrum of compound **3**

**Figure S20.** The ROESY (500 MHz,  $\text{DMSO-}d_6$ ) spectrum of compound **3**

**Figure S21.** The HRESIMS spectrum of compound **3**

**Figure S22.** The  $^1\text{H}$  NMR (500 MHz,  $\text{DMSO-}d_6$ ) spectrum of compound **4**

**Figure S23.** The  $^{13}\text{C}$  NMR and DEPT135 (125 MHz,  $\text{DMSO-}d_6$ ) spectrum of compound **4**

compound **4**

**Figure S24.** The  $^1\text{H}$ - $^1\text{H}$  COSY (500 MHz, DMSO- $d_6$ ) spectrum of compound **4**

**Figure S25.** The HSQC (500 MHz, DMSO- $d_6$ ) spectrum of compound **4**

**Figure S26.** The HMBC (500 MHz, DMSO- $d_6$ ) spectrum of compound **4**

**Figure S27.** The ROESY (500 MHz, DMSO- $d_6$ ) spectrum of compound **4**

**Figure S28.** The HRESIMS spectrum of compound **4**

**Figure S29.** The  $^1\text{H}$  NMR (500 MHz,  $\text{CD}_3\text{OD}-d_4$ ) spectrum of *S*-MTPA ester **1a** and *R*-MTPA ester **1b**

**Figure S30.** The  $^1\text{H}$  NMR (500 MHz,  $\text{CD}_3\text{COCD}_3-d_6$ ) spectrum of *S*-MTPA ester **2a** and *R*-MTPA ester **2b**

**Figure S31.** The  $^1\text{H}$  NMR (500 MHz,  $\text{CD}_3\text{OD}-d_4$ ) spectrum of *S*-MTPA ester **3a** and *R*-MTPA ester **3b**

### The 18S rDNA Gene Sequences Data of *Penicillium* sp. J-54

5'-GCTCATTAATCAGTTATCGTTTATTTGATAGTACCTTACTACATGGATACC  
TGTGGTAATTCTAGAGCTAATACATGCTACAAACCCCGACTTCAGGAAGGG  
GTGTATTTATTAGATAAAAAACCAACGCCCTTCGGGGCTCCTTGGTGAATCA  
TAATAACTTAACGAATCGCATGGCCTTGCGCCGGCGATGGTTCATTCAAATT  
TCTGCCCTATCAACTTTCGATGGTAGGATAGTGGCCTACCATGGTGGCAACG  
GGTAACGGGGAATTAGGGTTCGATTCCGGAGAGGGAGCCTGAGAAACGGC  
TACCACATCCAAGGAAGGCAGCAGGCGCGCAAATTACCCAATCCCGATACG  
GGGAGGTAGTGACAATAAATACTGATACGGGGCTCTTTCGGGTCTCGTAATT  
GGAATGAGAACAATTTAAATCCCTTAACGAGGAACAATTGGAGGGCAAGT  
CTGGTGCCAGCAGCCGCGGTAATTCCAGCTCCAATAGCGTATATTAAAGTTG  
TTGCAGTTAAAAAGCTCGTAGTTGAACCTTGGGCCTGGCTGGCCGGTCCGC  
CTCACCGCGAGTACTGGTCCGGCTGGGCCTTTCCTTCTGGGGAACCTCATG  
GCCTTCACTGGCTGTGGGGGGAACCAGGACTTTTACTGTGAAAAAATTAG  
AGTGTTCAAAGCAGGCCTTTGCTCGAATACATTAGCATGGAATAATAGAATA  
GGACGTGCGGTTCTATTTTGTTGGTTTCTAGGACCGCCGTAATGATTAATAG  
GGATAGTCGGGGGCGTCAGTATTCAGCTGTCAGAGGTGAAATTCTTGGATT  
TGCTGAAGACTAACTACTGCGAAAGCATTCGCCAAGGATGTTTTCATTAATC  
AGGGAACGAAAGTTAGGGGATCGAAGACGATCAGATACCGTCGTAGTCTT  
AACCATAAACTATGCCGACTAGGGATCGGACGGGATTCTATGATGACCCGTT  
CGGCACCTTACGAGAAATCAAAGTTTTTGGGTTCTGGGGGGAGTATGGTCG  
CAAGGCTGAACTTAAAGAAATTGACGGAAGGGCACCACAAGGCGTGGA  
GCCTGCGGCTTAATTTGACTCAACACGGGGAAACTCACCAGGTCCAGACA  
AAATAAGGATTGACAGATTGAGAGCTCTTTCTTGATCTTTTGGATGGTGGTG  
CATGGCCGTTCTTAGTTGGTGGAGTGATTTGTCTGCTTAATTGCGATAACGA  
ACGAGACCTCGGCCCTTAAATAGCCCGGTCCGCATCTGCGGGCCGCTGGC-  
3'.

**Figure S1.** The  $^1\text{H}$  NMR (500 MHz,  $\text{DMSO}-d_6$ ) spectrum of compound **1**

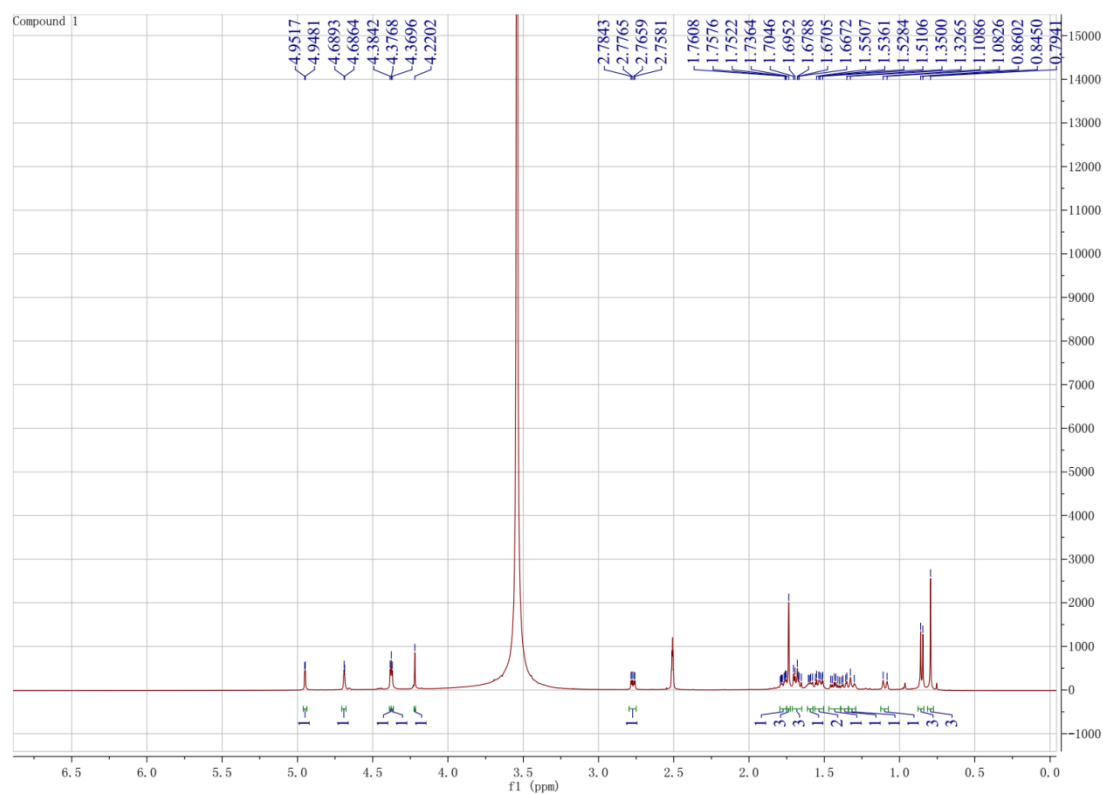

**Figure S2.** The  $^{13}\text{C}$ NMR and DEPT135 (125 MHz,  $\text{DMSO-}d_6$ ) spectrum of compound **1**

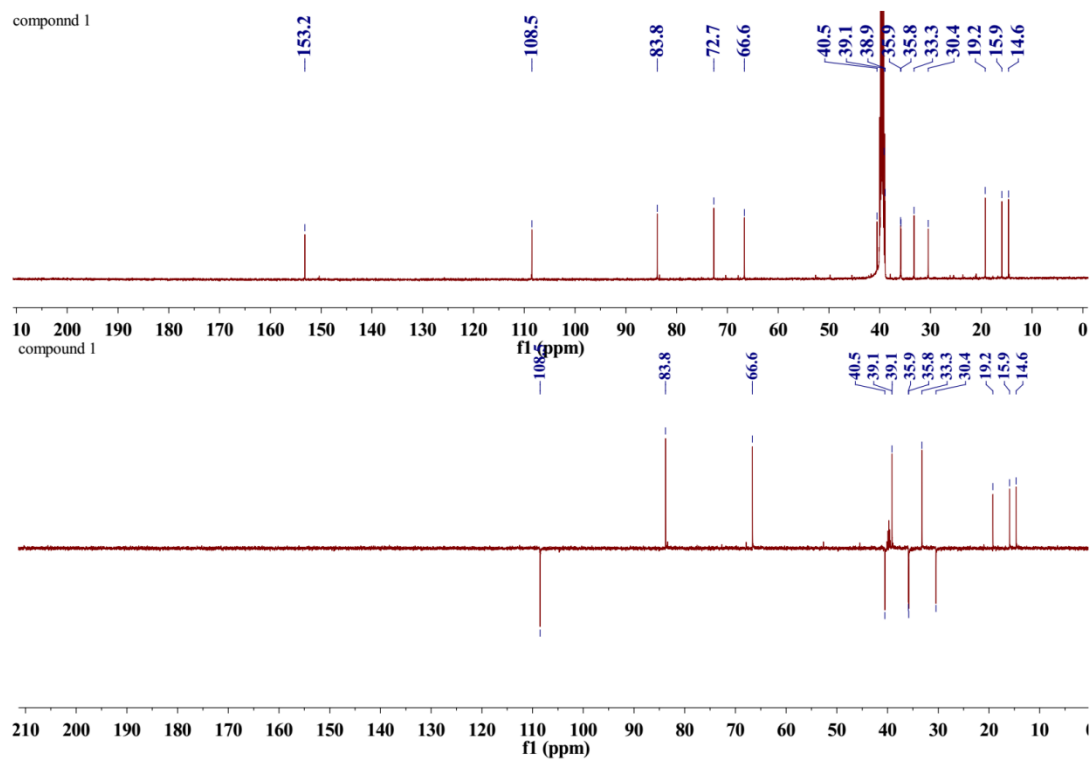

**Figure S3.** The  $^1\text{H}$ - $^1\text{H}$  COSY (500 MHz,  $\text{DMSO-}d_6$ ) spectrum of compound **1**

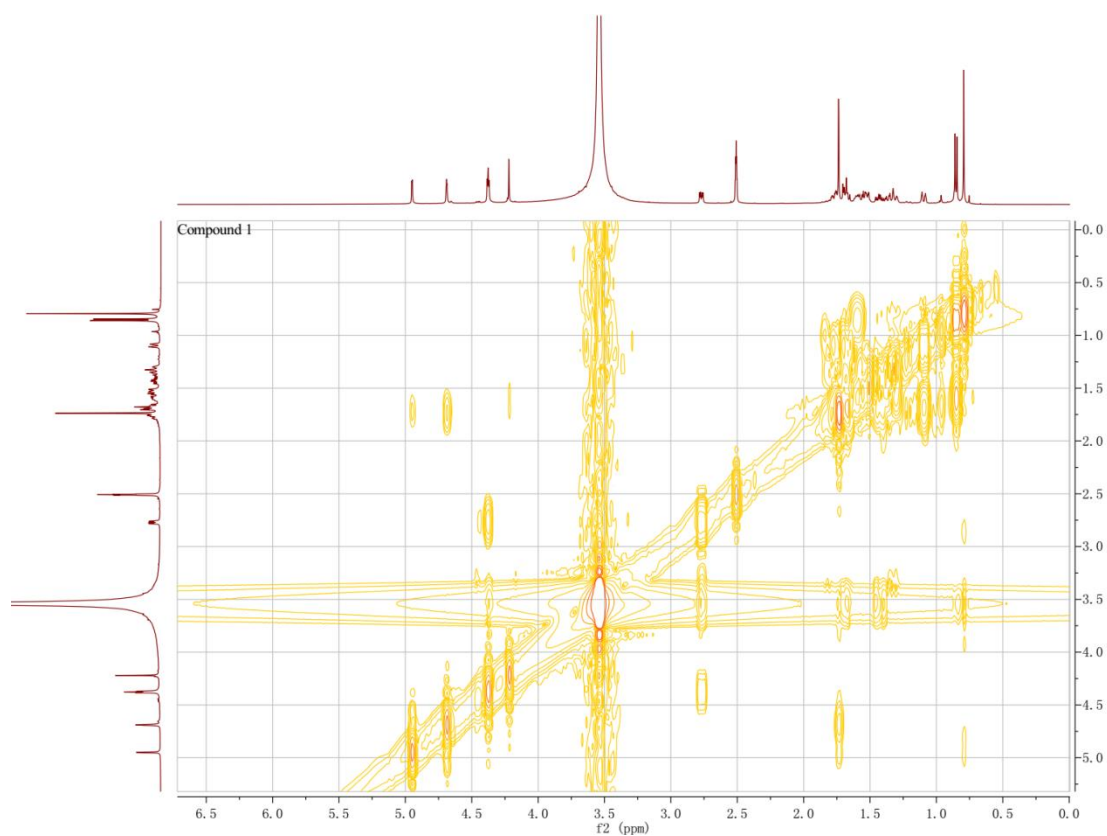

**Figure S4.** The HSQC (500 MHz,  $\text{DMSO-}d_6$ ) spectrum of compound **1**

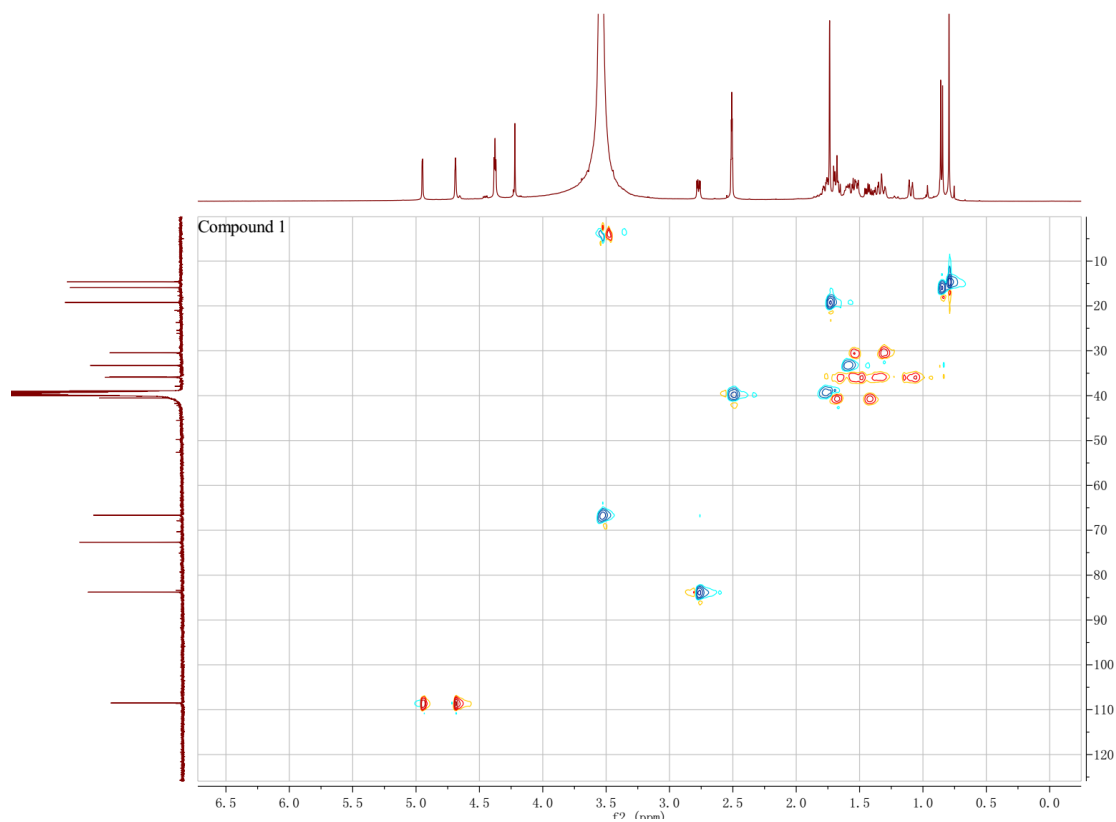

**Figure S5.** The HMBC (500 MHz, DMSO- $d_6$ ) spectrum of compound **1**

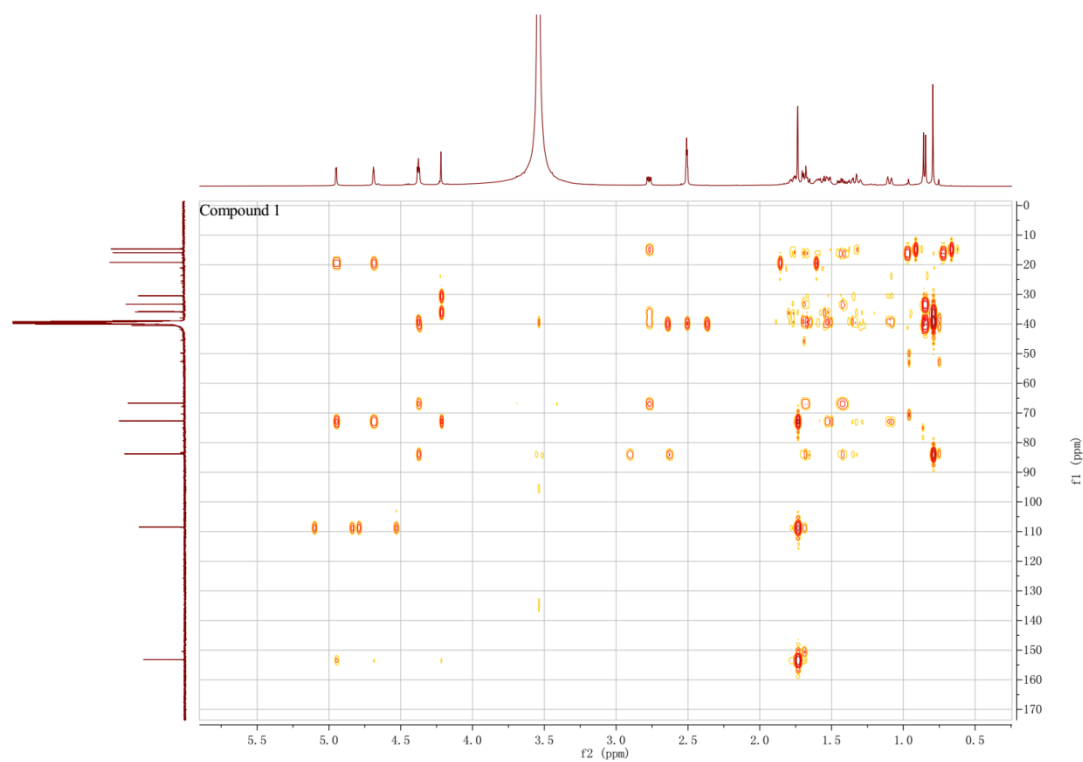

**Figure S6.** The ROESY (500 MHz, DMSO- $d_6$ ) spectrum of compound **1**

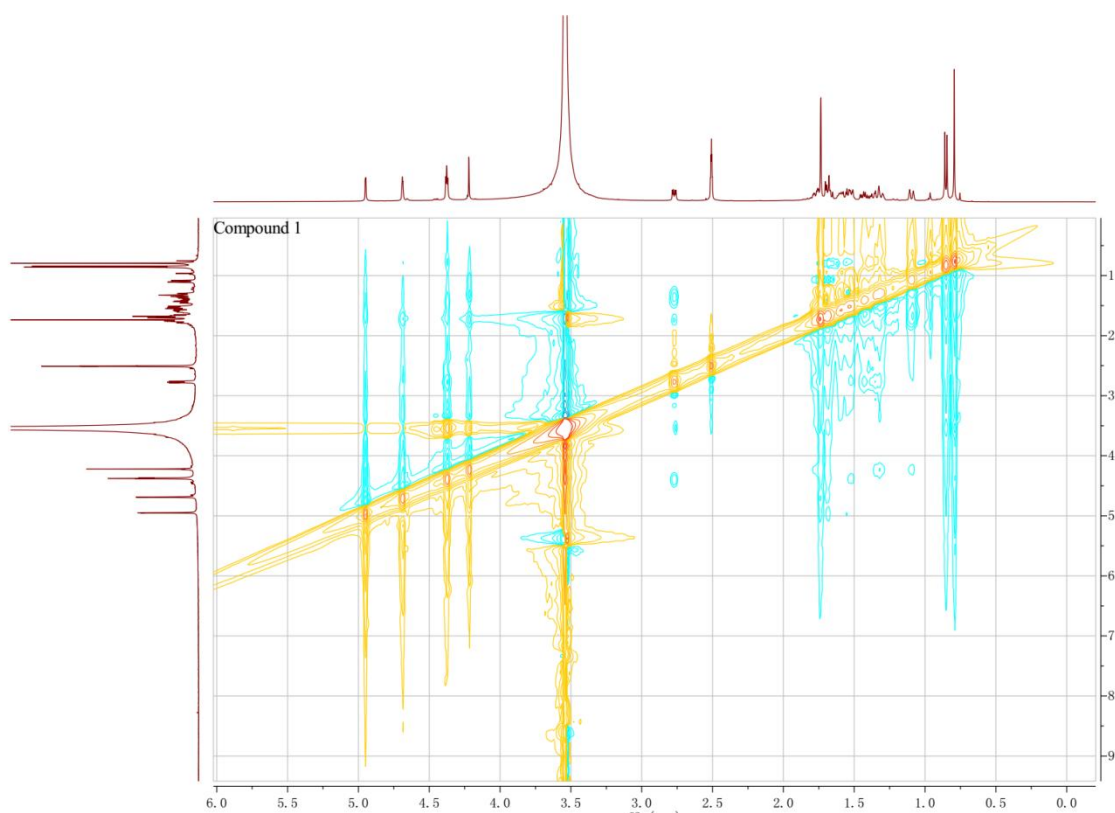

**Elemental Composition Report**

**Single Mass Analysis**  
Tolerance = 10.0 PPM / DBE: min = -10.0, max = 120.0  
Selected filters: None

Monoisotopic Mass, Odd and Even Electron Ions  
14 formula(e) evaluated with 1 results within limits (up to 51 closest results for each mass)

Elements Used:  
C: 0-200 H: 0-400 O: 2-4  
LM-2  
13:12:37 18-Jun-2014  
Voltage E1+

Autospec Premier  
P776  
162

| Mass     | Calc. Mass | mDa  | PPM  | DBE | i-FIT     | Formula    |
|----------|------------|------|------|-----|-----------|------------|
| 254.1878 | 254.1882   | -0.4 | -1.6 | 3.0 | 8546087.0 | C15 H26 O3 |

[illegible]

**Figure S9.** The  $^{13}\text{C}$  NMR and DEPT135 (125 MHz,  $\text{DMSO-}d_6$ ) spectrum of compound **2**

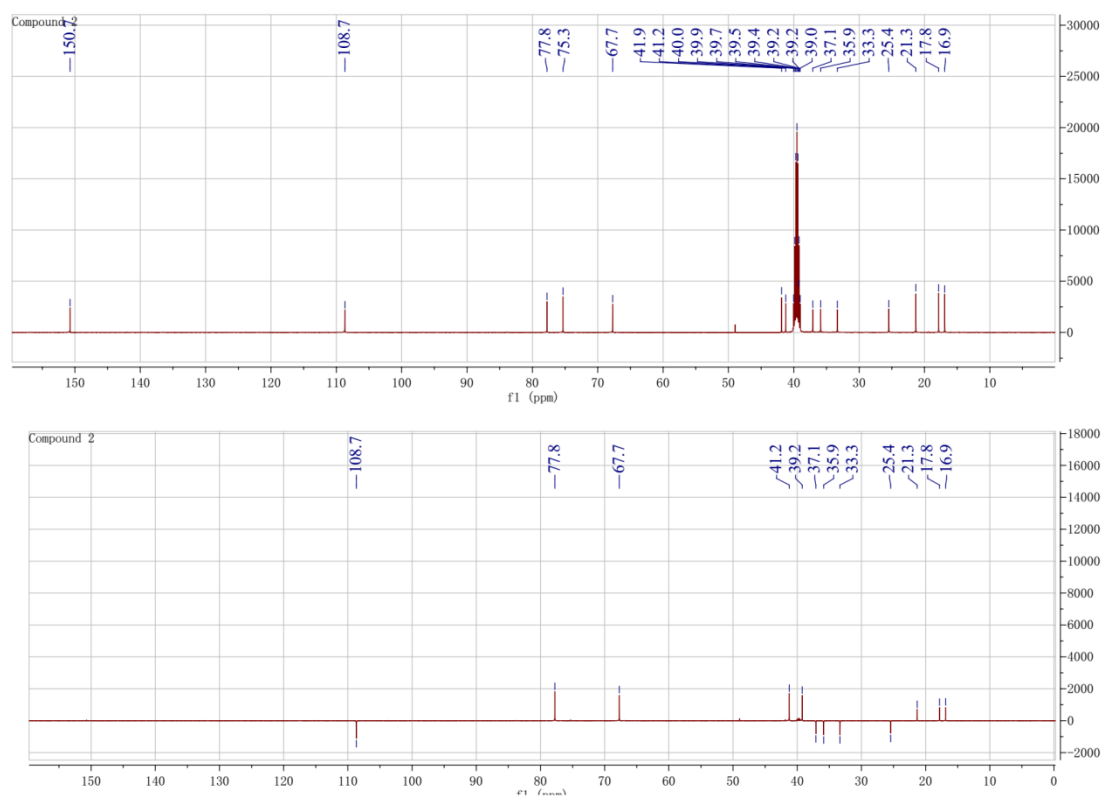

**Figure S10.** The  $^1\text{H}$ - $^1\text{H}$  COSY (500 MHz,  $\text{DMSO-}d_6$ ) spectrum of compound **2**

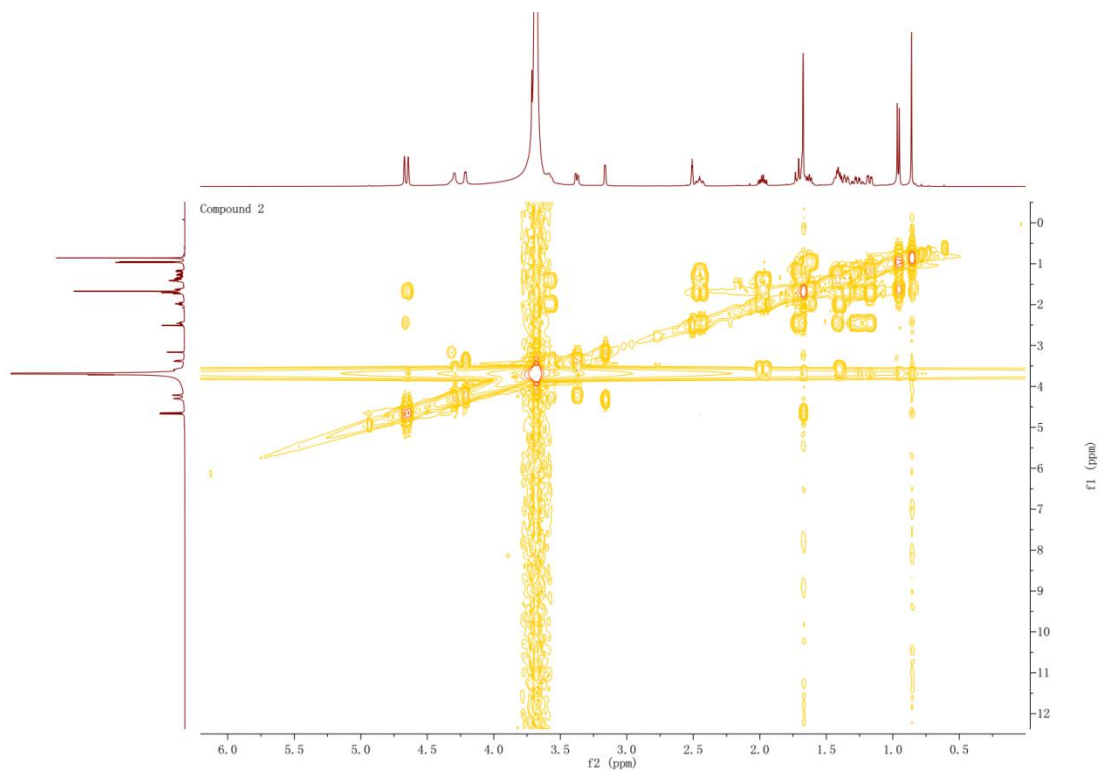

**Figure S11.** The HSQC (500 MHz, DMSO- $d_6$ ) spectrum of compound **2**

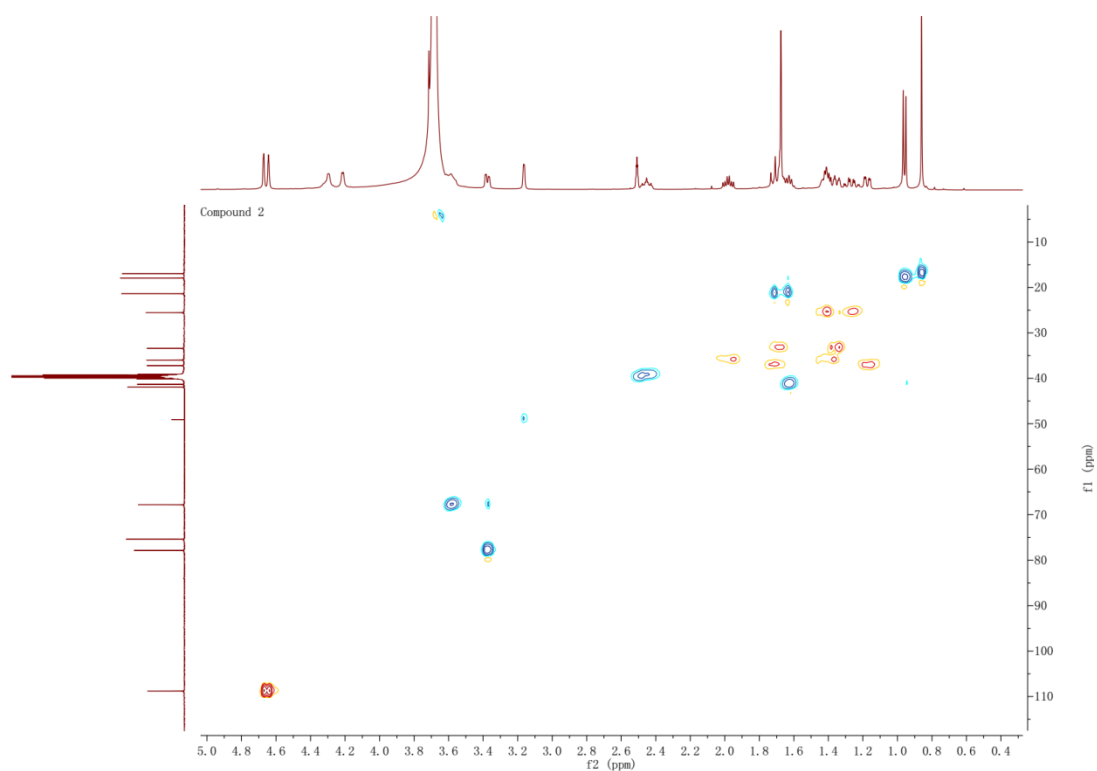

**Figure S12.** The HMBC (500 MHz, DMSO- $d_6$ ) spectrum of compound **2**

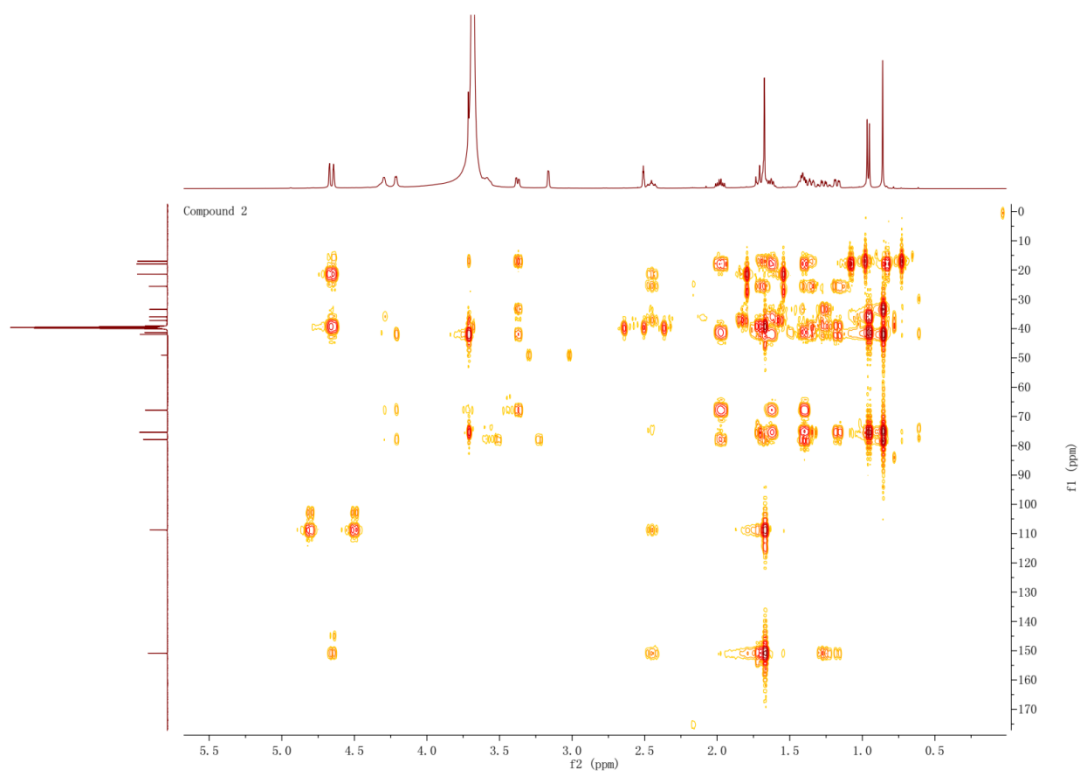

**Figure S13.** The ROESY (500 MHz, DMSO-*d*<sub>6</sub>) spectrum of compound **2**

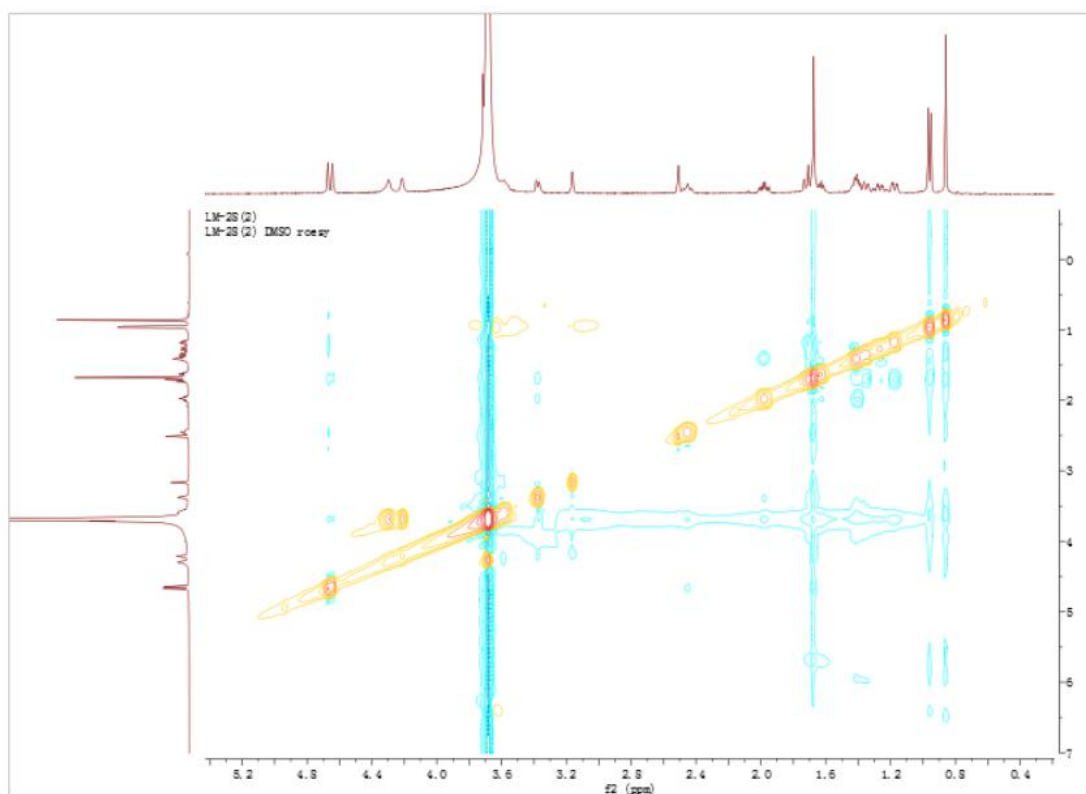

**Figure S14.** The HRESI spectrum of compound **2**

#### Elemental Composition Report

##### Single Mass Analysis

Tolerance = 22.0 mDa / DBE: min = -10.0, max = 120.0

Selected filters: None

Monoisotopic Mass, Odd and Even Electron Ions

14 formula(e) evaluated with 1 results within limits (up to 51 closest results for each mass)

Elements Used:

C: 0-200 H: 0-400 O: 2-4

LM-7

09:29:49 25-Jun-2014

Voltage EI+

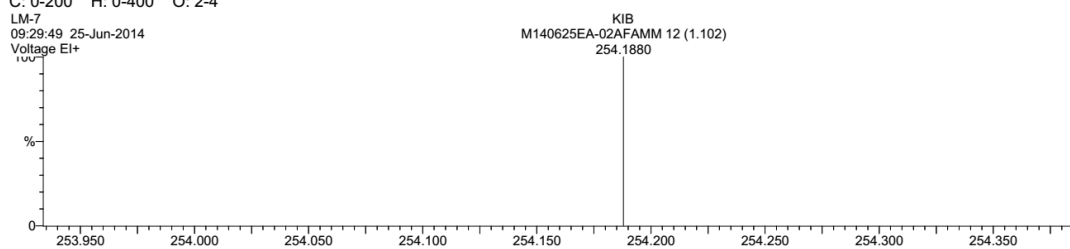

Minimum: 22.0 10.0 -10.0

Maximum: 22.0 10.0 120.0

| Mass     | Calc. Mass | mDa  | PPM  | DBE | i-FIT     | Formula    |
|----------|------------|------|------|-----|-----------|------------|
| 254.1880 | 254.1882   | -0.2 | -0.8 | 3.0 | 5546025.5 | C15 H26 O3 |

**Figure S15.** The  $^1\text{H}$  NMR (500 MHz,  $\text{DMSO-}d_6$ ) spectrum of compound **3**

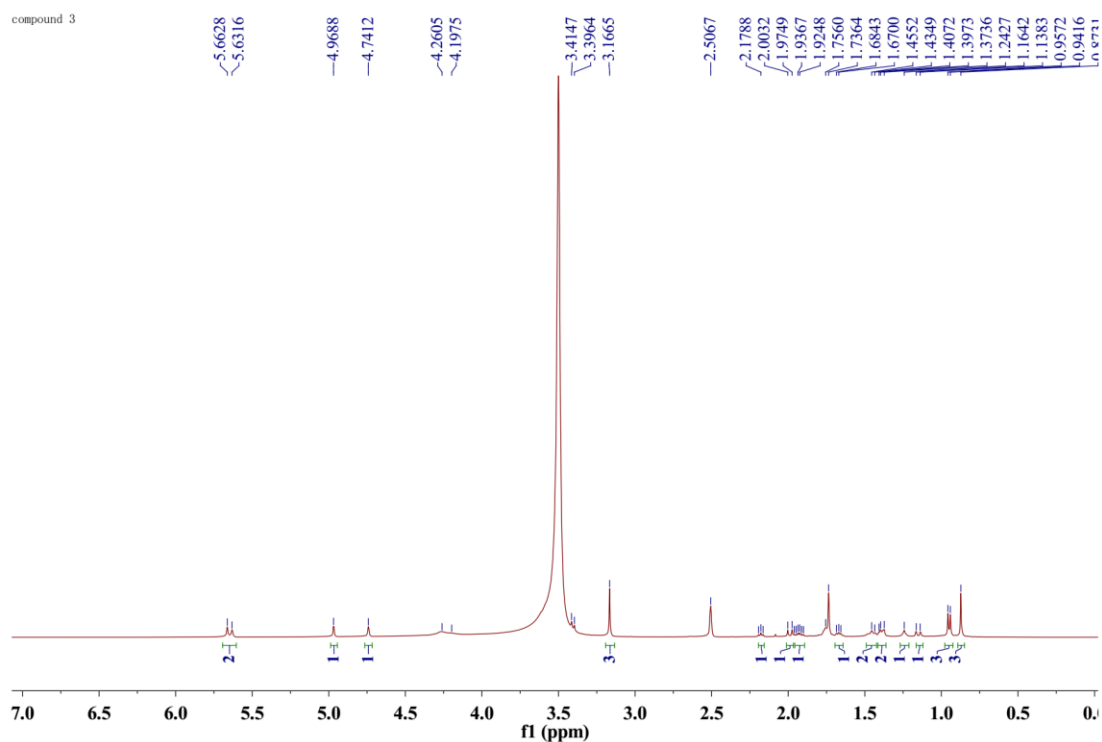

**Figure S16.** The  $^{13}\text{C}$  NMR and DEPT135 (125 MHz,  $\text{DMSO-}d_6$ ) spectrum of compound **3**

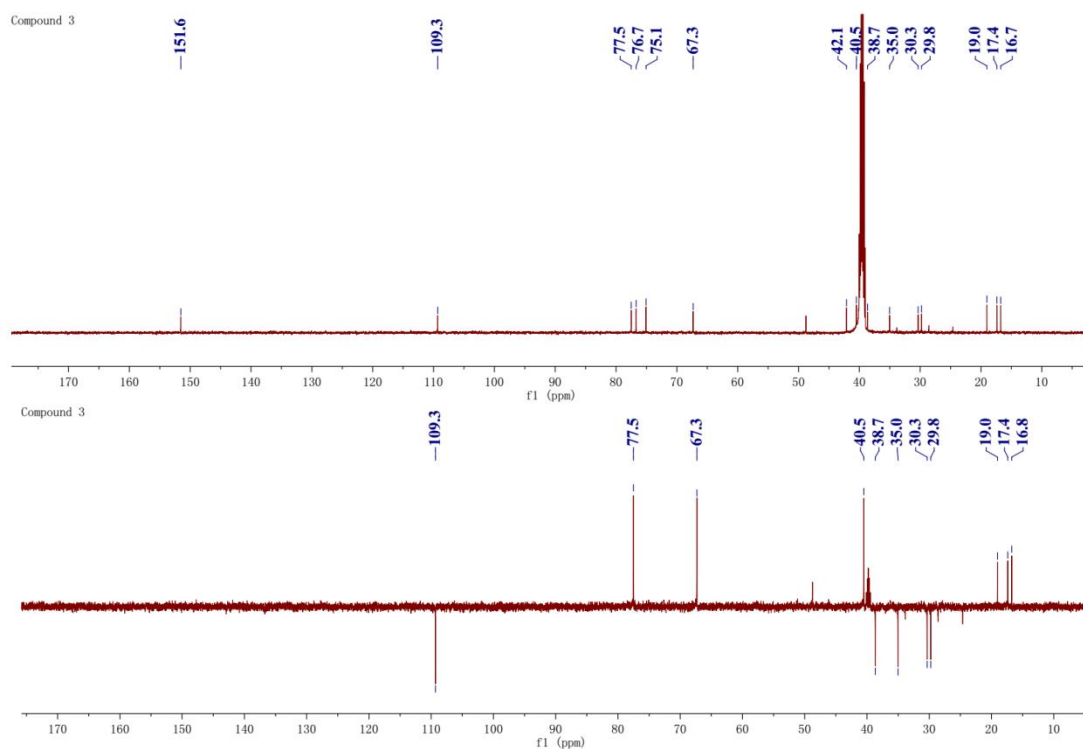

**Figure S17.** The  $^1\text{H}$ - $^1\text{H}$  COSY (500 MHz,  $\text{DMSO-}d_6$ ) spectrum of compound **3**

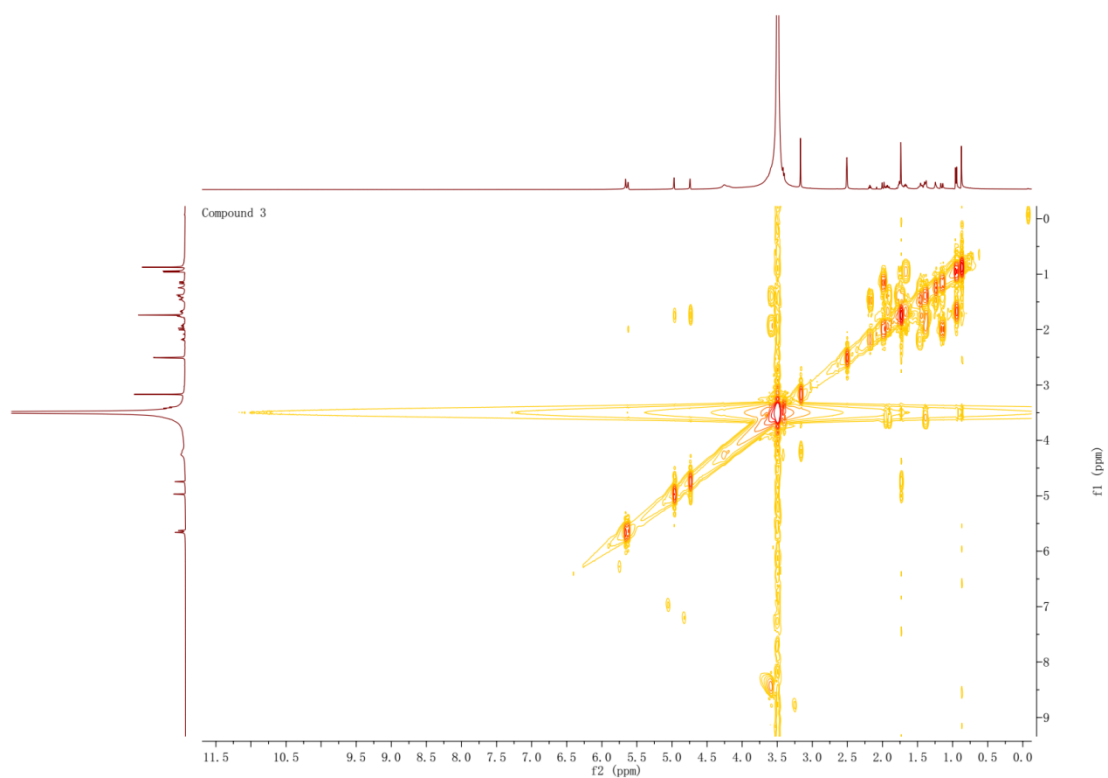

**Figure S18.** The HSQC (500 MHz, DMSO-*d*<sub>6</sub>) spectrum of compound **3**

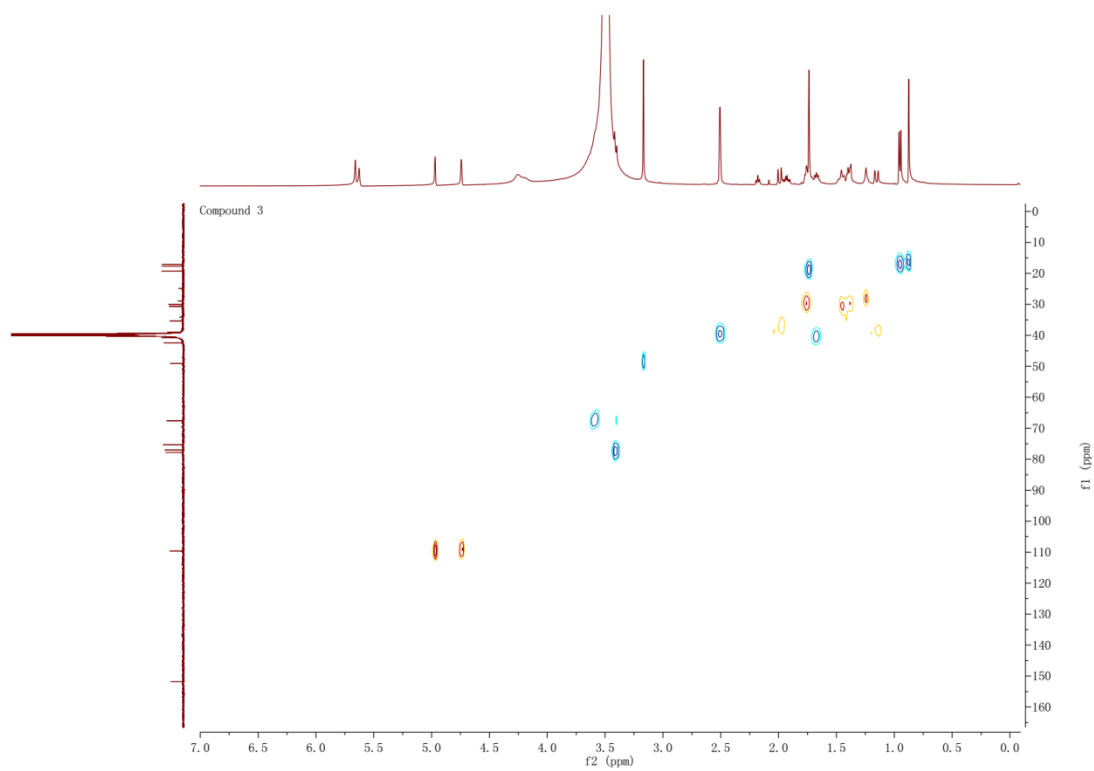

**Figure S19.** The HMBC (500 MHz, DMSO-*d*<sub>6</sub>) spectrum of compound **3**

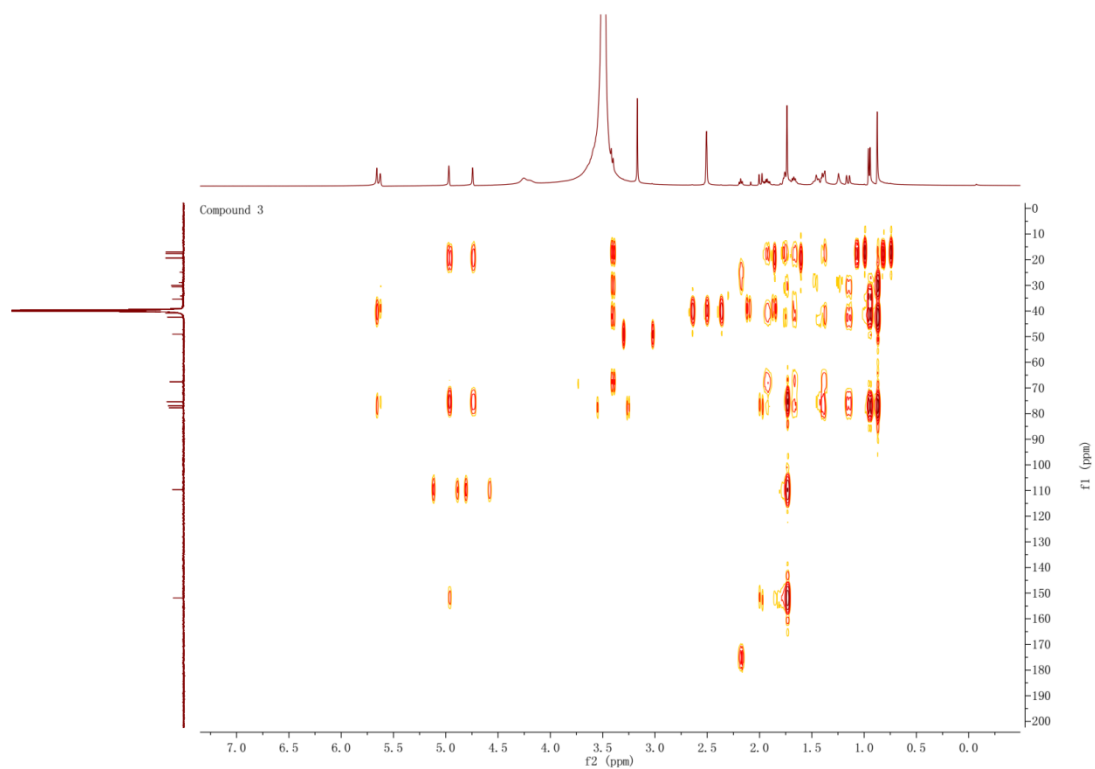

**Figure S20.** The  $^1\text{H}$ - $^1\text{H}$  ROESY (500 MHz,  $\text{DMSO}-d_6$ ) spectrum of compound **3**

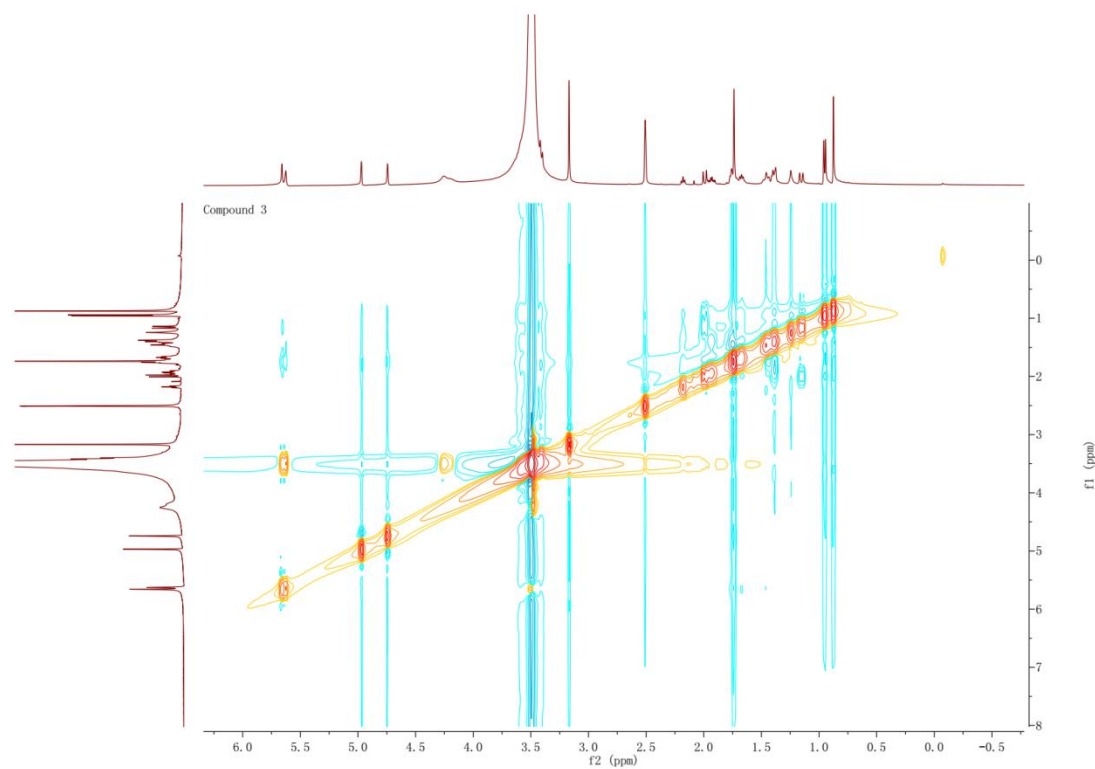

**Figure S21.** The HRESI spectrum of compound **3**

## Single Mass Analysis

Tolerance = 22.0 mDa / DBE: min = -10.0, max = 120.0

Selected filters: None

Monoisotopic Mass, Odd and Even Electron Ions

14 formula(e) evaluated with 1 results within limits (up to 51 closest results for each mass)

Elements Used:

C: 0-200 H: 0-400 O: 3-5

LM-25

09:48:02 25-Jun-2014

Voltage EI+

K1B  
M140625EA-04AFAMM 21 (1.928)  
270.1833Autospec Premier  
P776  
4.89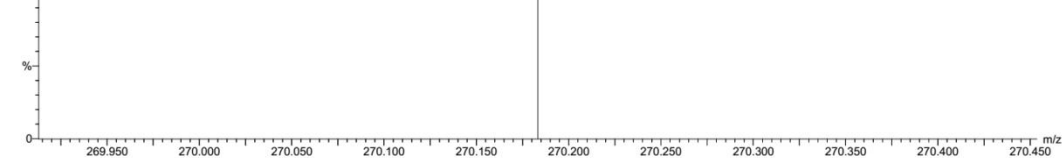

|          |            |      |       |     |           |            |
|----------|------------|------|-------|-----|-----------|------------|
| Minimum: | 22.0       | 10.0 | -10.0 |     |           |            |
| Maximum: |            |      | 120.0 |     |           |            |
| Mass     | Calc. Mass | mDa  | PPM   | DBE | i-FIT     | Formula    |
| 270.1833 | 270.1831   | 0.2  | 0.7   | 3.0 | 5546025.5 | C15 H26 O4 |

**Figure S22** The  $^1\text{H}$  NMR (500 MHz, DMSO- $d_6$ ) spectrum of compound **4**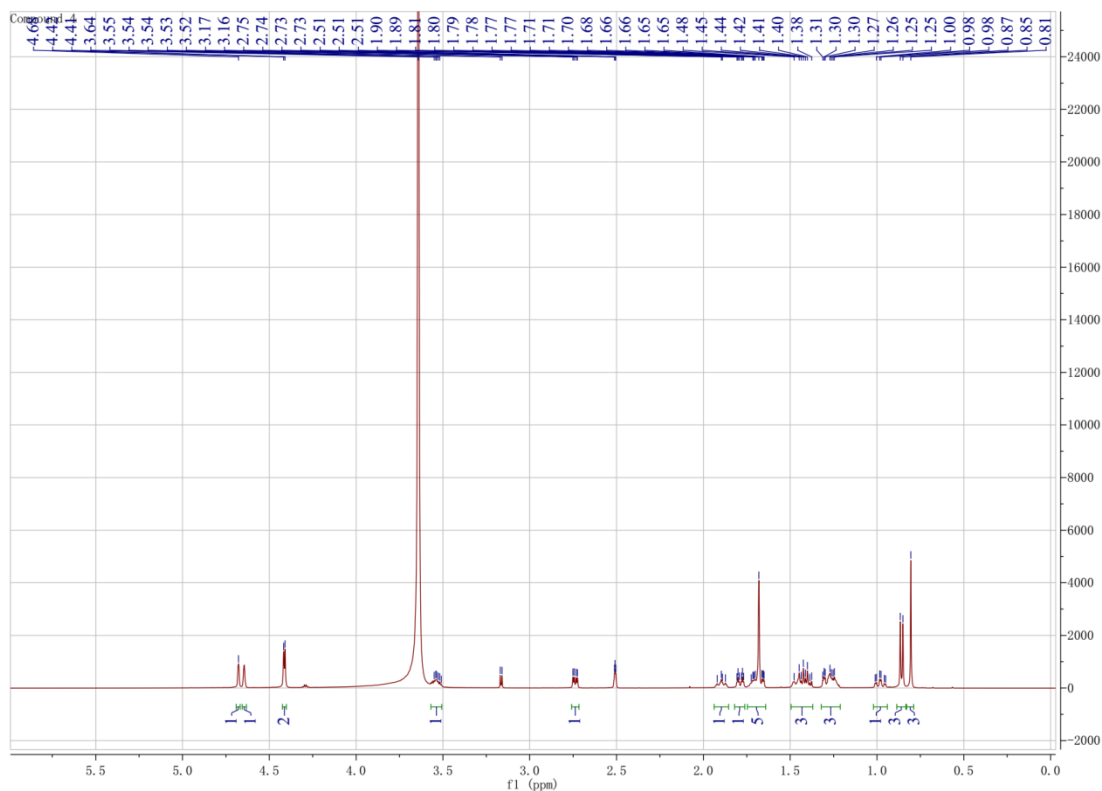**Figure S23.** The  $^{13}\text{C}$  NMR (125 MHz, DMSO- $d_6$ ) spectrum of compound **4**

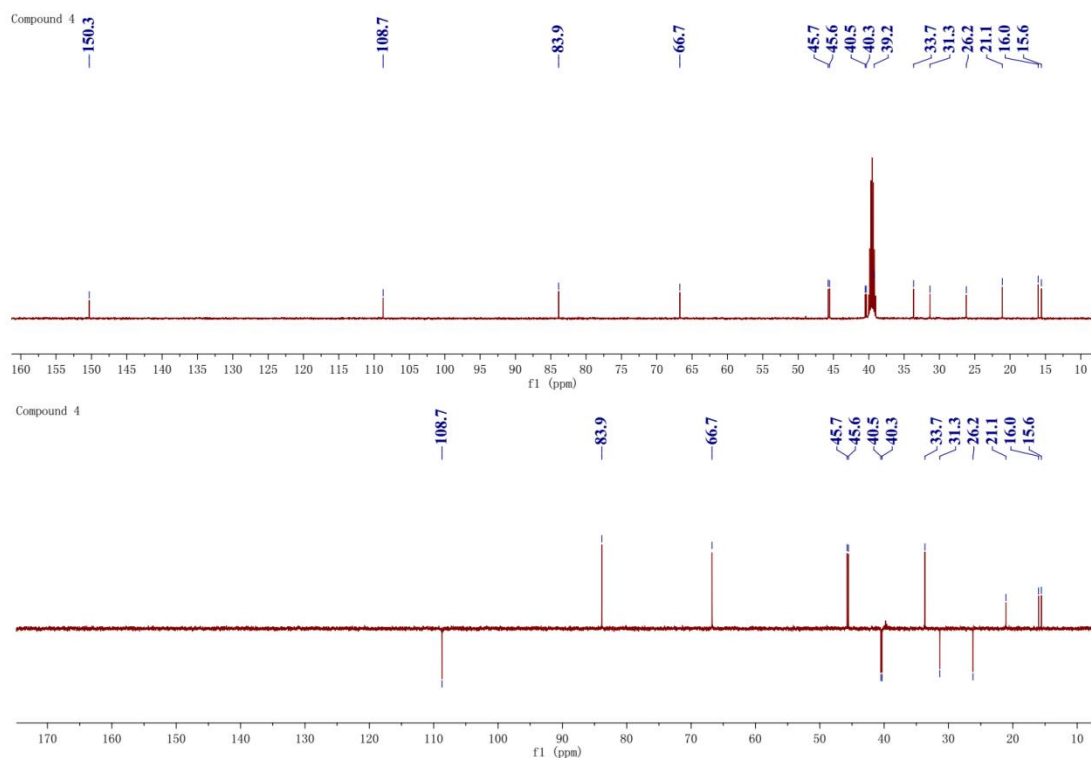

**Figure S24.** The  $^1\text{H}$ - $^1\text{H}$  COSY (500 MHz,  $\text{DMSO-}d_6$ ) spectrum of compound **4**

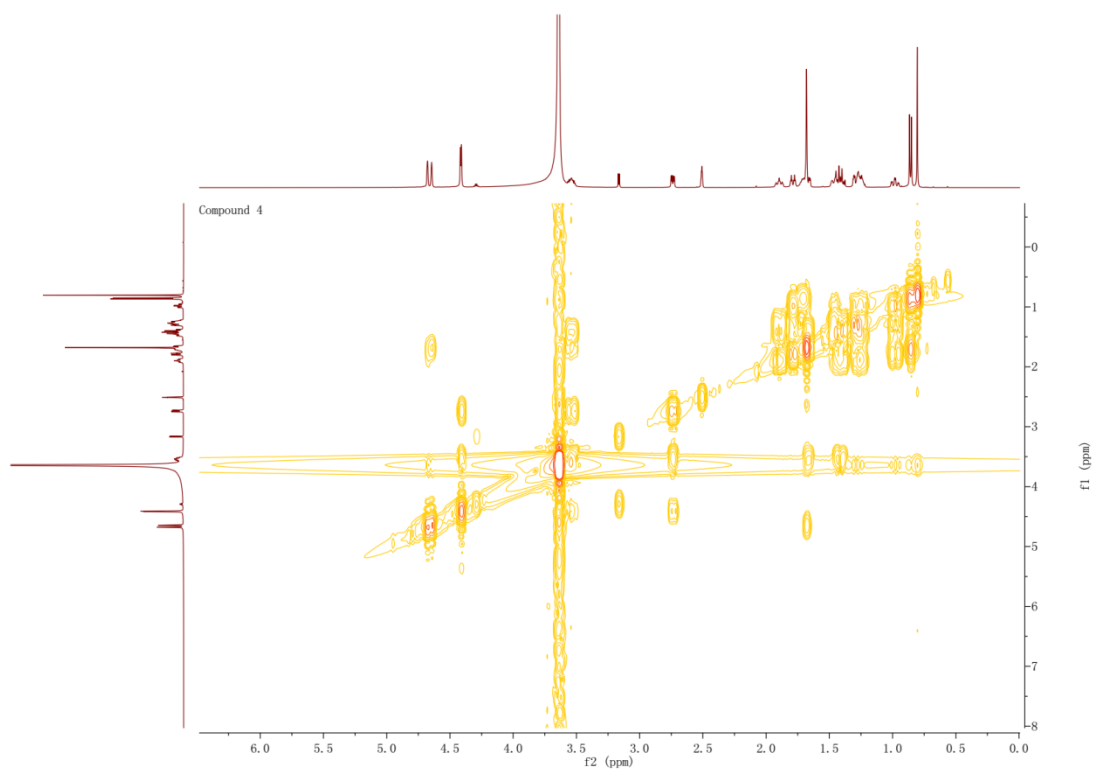

**Figure S25.** The HSQC (500 MHz, DMSO- $d_6$ ) spectrum of compound **4**

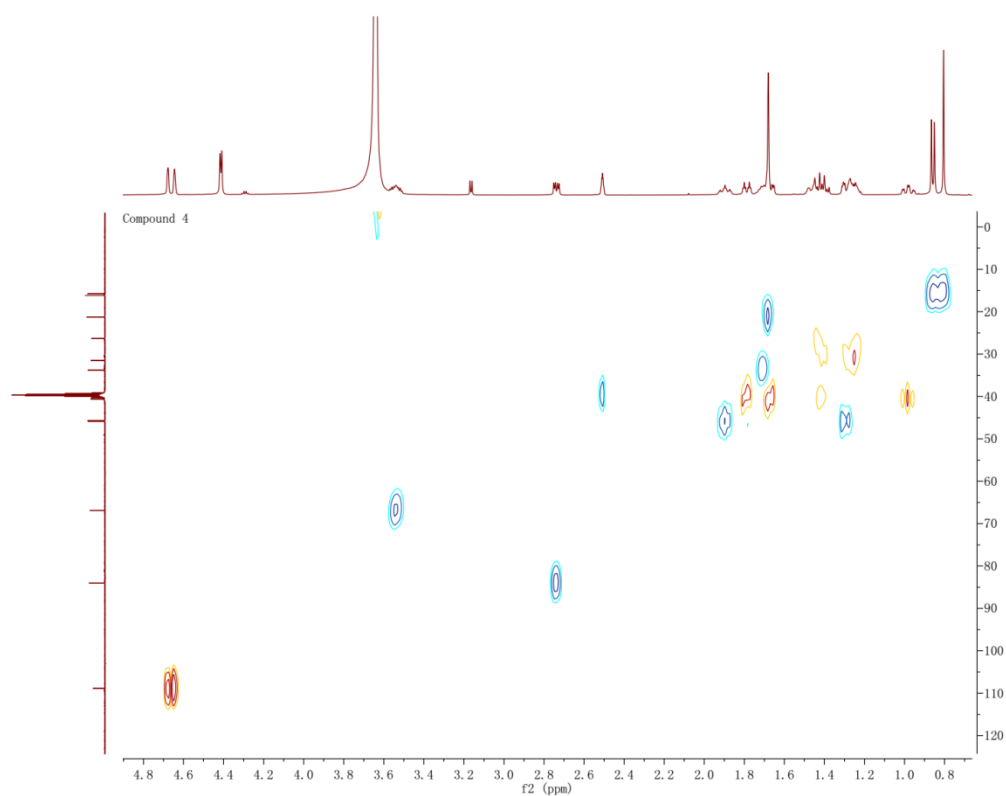

**Figure S26.** The HMBC (500 MHz, DMSO- $d_6$ ) spectrum of compound **4**

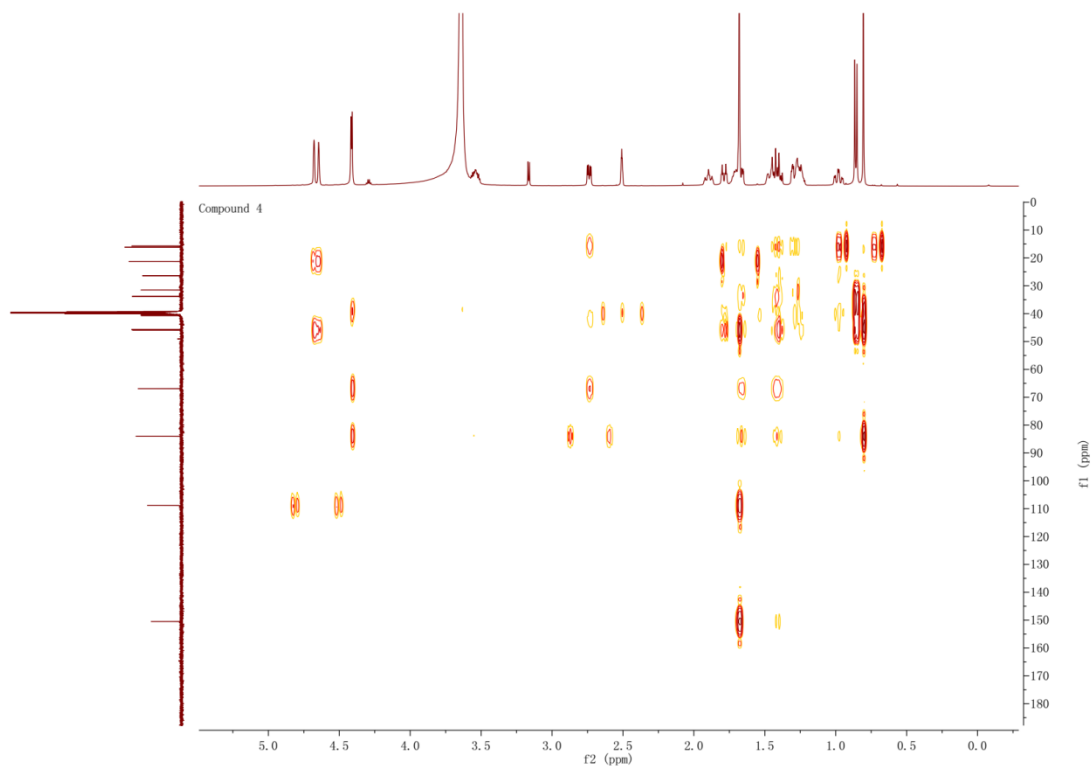

**Figure S27.** The  $^1\text{H}$ - $^1\text{H}$  ROESY (500 MHz, DMSO- $d_6$ ) spectrum of compound **4**

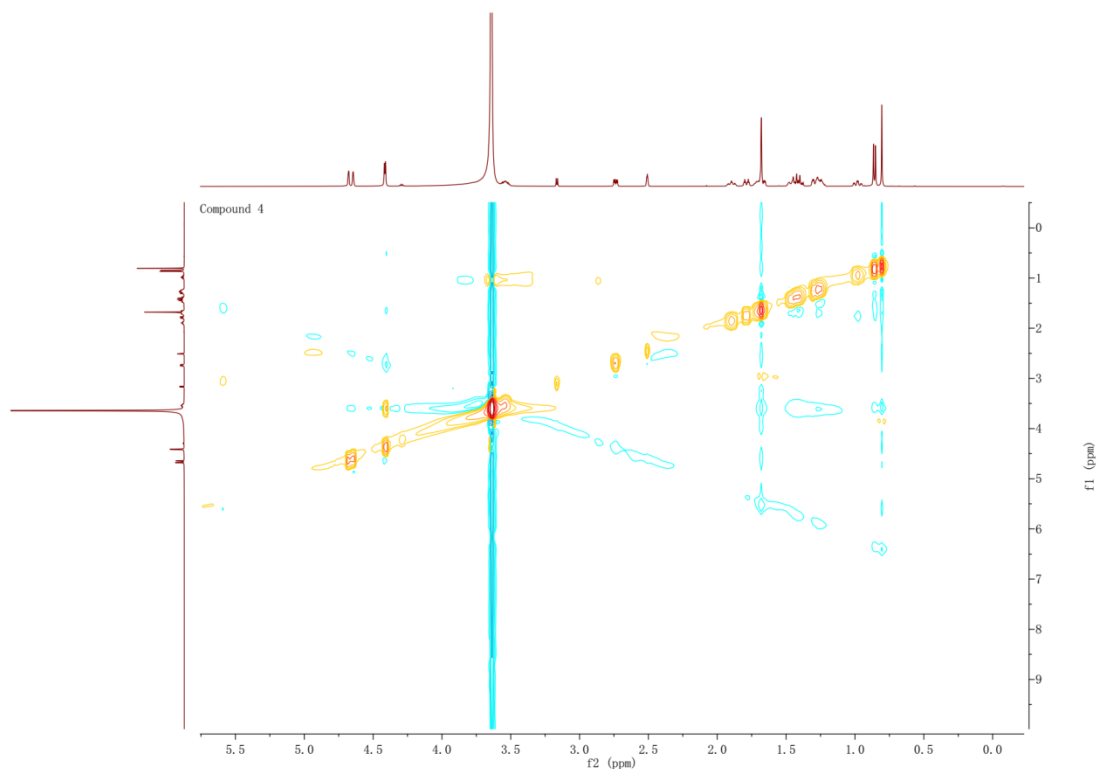

**Figure S28.** The HRESI spectrum of compound **4**

#### Elemental Composition Report

Page 1

#### Single Mass Analysis

Tolerance = 22.0 mDa / DBE: min = -10.0, max = 120.0

Selected filters: None

Monoisotopic Mass, Odd and Even Electron Ions

14 formula(e) evaluated with 1 results within limits (up to 51 closest results for each mass)

Elements Used:

C: 0-200 H: 0-400 O: 1-3

LM-6

09:24:18 25-Jun-2014

Voltage E1+

KIB  
M140625EA-01AFAMM 18 (1.653)  
238.1931

Autospec Premier  
P776  
12.4

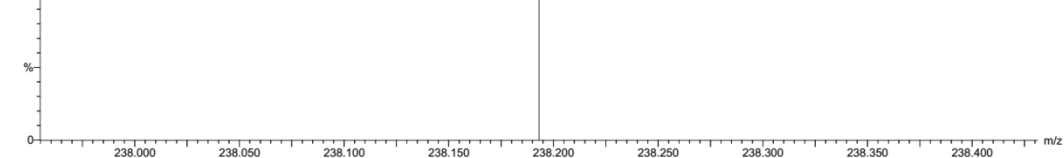

|          |            |      |      |       |           |            |
|----------|------------|------|------|-------|-----------|------------|
| Minimum: |            |      |      | -10.0 |           |            |
| Maximum: | 22.0       | 10.0 |      | 120.0 |           |            |
| Mass     | Calc. Mass | mDa  | PPM  | DBE   | i-FIT     | Formula    |
| 238.1931 | 238.1933   | -0.2 | -0.8 | 3.0   | 5546026.0 | C15 H26 O2 |

**Figure S29.** The  $^1\text{H}$  NMR (500 MHz,  $\text{CD}_3\text{OD}-d_4$ ) spectrum of *S*-MTPA ester **1a** and

<sup>1</sup>H NMR spectrum of compound 10a in CDCl<sub>3</sub>. The x-axis represents chemical shift (ppm) from 0.0 to 8.5. The y-axis represents intensity from 0.0E+00 to 1.2E+08. The spectrum shows a complex set of peaks in the aromatic region (6.5-7.5 ppm) and aliphatic region (1.0-3.5 ppm). Integration values are provided below the baseline for various peak groups.

| Chemical Shift (ppm) | Integration |
|----------------------|-------------|
| 7.511                | 1.00        |
| 7.504                | 1.00        |
| 7.496                | 1.00        |
| 7.3367               | 1.00        |
| 7.3296               | 1.00        |
| 7.3241               | 1.00        |
| 7.3173               | 1.00        |
| 7.3154               | 1.00        |
| 7.3112               | 1.00        |
| 7.3083               | 1.00        |
| 5.2458               | 1.00        |
| 5.2319               | 1.00        |
| 5.2257               | 1.00        |
| 5.2119               | 1.00        |
| 4.9340               | 1.00        |
| 4.6994               | 1.00        |
| 3.5198               | 1.00        |
| 3.2136               | 1.00        |
| 3.2105               | 1.00        |
| 3.2074               | 1.00        |
| 3.1709               | 1.00        |
| 3.1510               | 1.00        |
| 1.8427               | 1.00        |
| 1.8394               | 1.00        |
| 1.8297               | 1.00        |
| 1.8173               | 1.00        |
| 1.8135               | 1.00        |
| 1.8085               | 1.00        |
| 1.7969               | 1.00        |
| 1.7240               | 1.00        |
| 1.6849               | 1.00        |
| 1.6658               | 1.00        |
| 1.6575               | 1.00        |
| 1.6305               | 1.00        |
| 1.5936               | 1.00        |
| 1.5888               | 1.00        |
| 1.5803               | 1.00        |
| 1.5680               | 1.00        |
| 1.5620               | 1.00        |
| 1.5279               | 1.00        |
| 1.5164               | 1.00        |
| 1.5034               | 1.00        |
| 1.4921               | 1.00        |
| 1.4790               | 1.00        |
| 1.4580               | 1.00        |
| 1.4508               | 1.00        |
| 1.4319               | 1.00        |
| 1.4243               | 1.00        |
| 1.4017               | 1.00        |
| 1.3752               | 1.00        |
| 1.3696               | 1.00        |
| 1.1893               | 1.00        |
| 1.1736               | 1.00        |

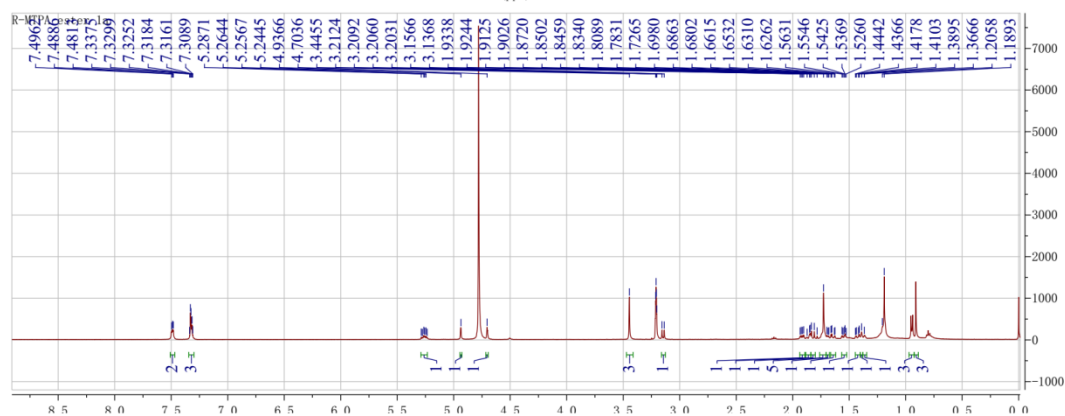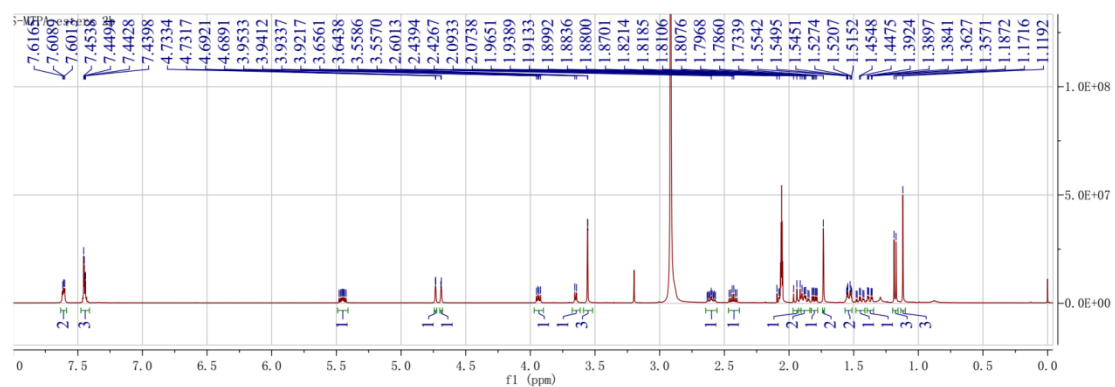

**Figure S31.** The  $^1\text{H}$  NMR (500 MHz,  $\text{CD}_3\text{OD}-d_4$ ) spectrum of *S*-MTPA ester **3a** and

*R*-MTPA ester**3b**

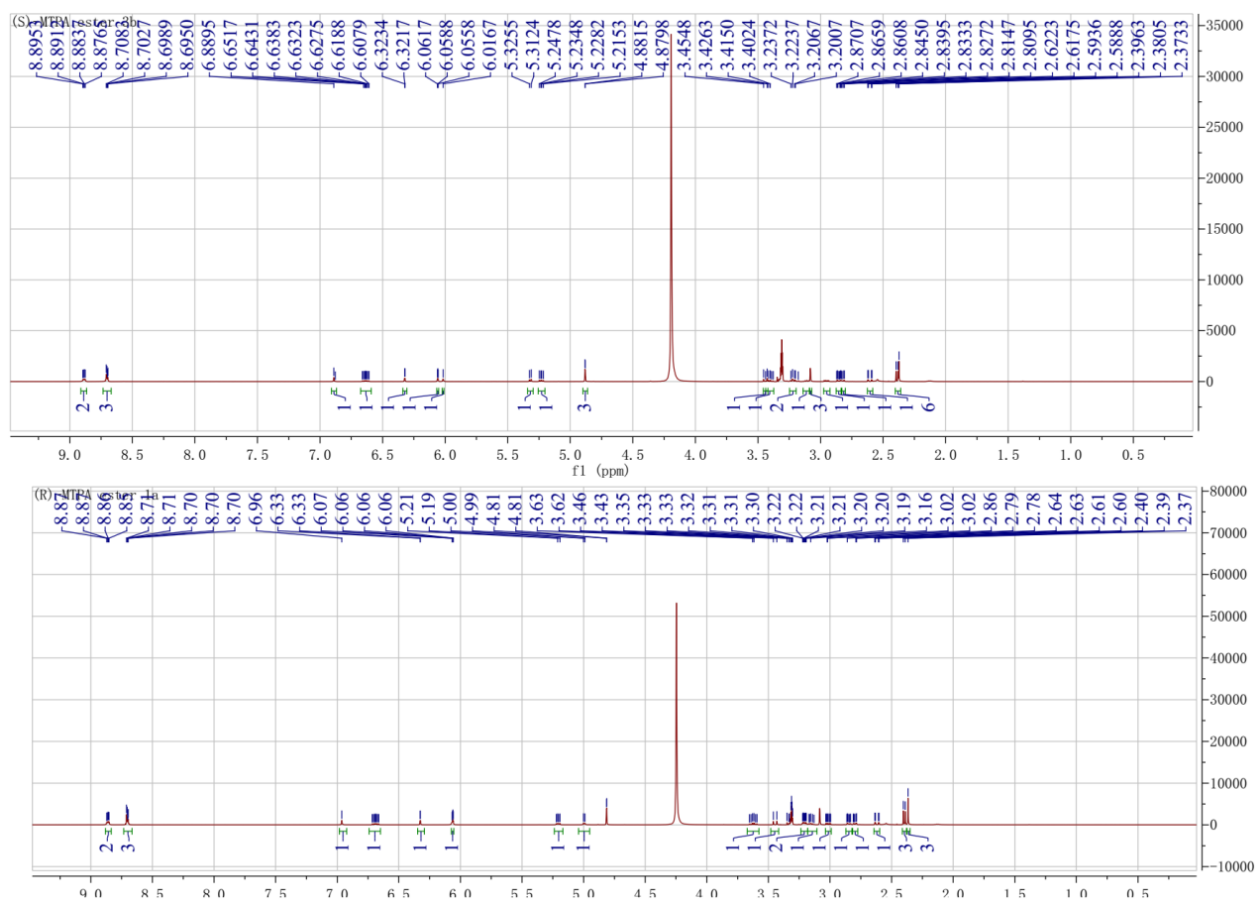

Supplement: s1 [file s1]
